# Supplementary material for: Distinct Immune Signatures Indicative of Treatment Response and Immune-Related Adverse Events in Melanoma Patients under Immune Checkpoint Inhibitor Therapy
Source: MDPI journal article supplement (doi:10.3390/ijms22158017), 2021-07-27
Supplement: s1 [file s1]

**Supplementary Table S1:** List of antibodies used in the present study.

| <b>Antibodies</b>                                      | <b>Clone</b>    | <b>Fluorochrome</b> | <b>Company</b> | <b>Catalogue number</b> |
|--------------------------------------------------------|-----------------|---------------------|----------------|-------------------------|
| <b>Immune status</b>                                   |                 |                     |                |                         |
| CD3                                                    | UCHT1           | V500                | BD Horizon     | 561416                  |
| CD4                                                    | RPA-T4          | V450                | BD Horizon     | 560345                  |
| CD8                                                    | SK1             | PerCP               | BD             | 345774                  |
| CD16                                                   | B73.1           | PE-Cy7              | BD             | 335823                  |
| CD19                                                   | SJ25C1          | APC                 | BD             | 345791                  |
| CD38                                                   | HB-7            | PE                  | BD             | 345806                  |
| CD45                                                   | 2D1             | APC-H7              | BD Pharmingen  | 560178                  |
| CD56                                                   | NCAM16.2        | PE-Cy7              | BD             | 335826                  |
| Anti-HLA-DR                                            | L243            | FITC                | BD             | 347400                  |
| <b><math>\alpha/\beta/\gamma/\delta</math> T-cells</b> |                 |                     |                |                         |
| Anti-TCR $\alpha/\beta$                                | WT31            | FITC                | BD             | 333140                  |
| Anti-TCR $\gamma/\delta$                               | B1              | APC                 | BioLegend      | 331212                  |
| <b>T-cell differentiation</b>                          |                 |                     |                |                         |
| CD31                                                   | WM59            | PE                  | BD Pharmingen  | 555446                  |
| CD45RA                                                 | HI100           | FITC                | BD Pharmingen  | 555488                  |
| CD45RO                                                 | UCHL1           | PerCP-Cy5.5         | BD Pharmingen  | 560607                  |
| CD197                                                  | 3D12            | Alexa Fluor 647     | BD Pharmingen  | 557734                  |
| <b>Regulatory T cells</b>                              |                 |                     |                |                         |
| CD25                                                   | 2A3             | PE                  | BD             | 341011                  |
| CD39                                                   | TU66            | FITC                | BD Pharmingen  | 561444                  |
| CD127                                                  | HIL-7R-M21      | Alexa Fluor 647     | BD Pharmingen  | 558598                  |
| <b>Monocytes</b>                                       |                 |                     |                |                         |
| CD14                                                   | M5E2            | PE-Cy7              | BD Pharmingen  | 557742                  |
| <b>CTLA-4/PD-1</b>                                     |                 |                     |                |                         |
| CD152 (CTLA-4)                                         | BN13            | APC                 | BD Pharmingen  | 555855                  |
| CD279 (PD-1)                                           | EH12.1          | PE                  | BD Pharmingen  | 560795                  |
| <b>Phosphorylated STAT 5</b>                           |                 |                     |                |                         |
| pStat5                                                 | 47/Stat5(pY694) | Alexa Fluor 647     | BD Phosflow    | 612599                  |
