# Supplementary material for: Distinct Immune Signatures Indicative of Treatment Response and Immune-Related Adverse Events in Melanoma Patients under Immune Checkpoint Inhibitor Therapy
Source: MDPI journal article supplement (doi:10.3390/ijms22158017), 2021-07-27
Supplement: s1 [file s1]

**Supplementary Table S2:** List of cell populations analyzed in the present study.

| Panel 1: Immune status                        |                                                                                                               |
|-----------------------------------------------|---------------------------------------------------------------------------------------------------------------|
| Leukocytes                                    |                                                                                                               |
| Lymphocytes                                   |                                                                                                               |
| T lymphocytes                                 | CD45 <sup>+</sup> CD3 <sup>+</sup>                                                                            |
| T helper cells                                | CD45 <sup>+</sup> CD3 <sup>+</sup> CD4 <sup>+</sup> CD8 <sup>-</sup>                                          |
| Cytotoxic T cells                             | CD45 <sup>+</sup> CD3 <sup>+</sup> CD4 <sup>-</sup> CD8 <sup>+</sup>                                          |
| Ratio CD4/CD8                                 |                                                                                                               |
| B cells                                       | CD45 <sup>+</sup> CD19 <sup>+</sup>                                                                           |
| NK cells                                      | CD45 <sup>+</sup> CD3 <sup>-</sup> CD16/56 <sup>+</sup>                                                       |
| Activated NK cells                            | CD45 <sup>+</sup> CD3 <sup>-</sup> CD16/56 <sup>+</sup> CD38 <sup>+</sup> HLA-DR <sup>+</sup>                 |
|                                               | CD45 <sup>+</sup> CD3 <sup>-</sup> CD16/56 <sup>+</sup> CD38 <sup>+</sup>                                     |
|                                               | CD45 <sup>+</sup> CD3 <sup>-</sup> CD16/56 <sup>+</sup> HLA-DR <sup>+</sup>                                   |
| NK T cells                                    | CD45 <sup>+</sup> CD3 <sup>+</sup> CD16/56 <sup>+</sup>                                                       |
| Activated CD4 <sup>+</sup> T cells            | CD45 <sup>+</sup> CD4 <sup>+</sup> CD8 <sup>-</sup> CD38 <sup>+</sup> HLA-DR <sup>+</sup>                     |
|                                               | CD45 <sup>+</sup> CD4 <sup>+</sup> CD8 <sup>-</sup> HLA-DR <sup>+</sup>                                       |
|                                               | CD45 <sup>+</sup> CD4 <sup>+</sup> CD8 <sup>-</sup> CD38 <sup>+</sup>                                         |
| Activated CD8 <sup>+</sup> T cells            | CD45 <sup>+</sup> CD4 <sup>-</sup> CD8 <sup>+</sup> CD38 <sup>+</sup> HLA-DR <sup>+</sup>                     |
|                                               | CD45 <sup>+</sup> CD4 <sup>-</sup> CD8 <sup>+</sup> HLA-DR <sup>+</sup>                                       |
|                                               | CD45 <sup>+</sup> CD4 <sup>-</sup> CD8 <sup>+</sup> CD38 <sup>+</sup>                                         |
| Panel 2: $\alpha/\beta/\gamma/\delta$ T cells |                                                                                                               |
| $\alpha/\beta$ T cells                        | CD45 <sup>+</sup> CD3 <sup>+</sup> $\alpha/\beta$ <sup>+</sup>                                                |
| $\gamma/\delta$ T cells                       | CD45 <sup>+</sup> CD3 <sup>+</sup> $\gamma/\delta$ <sup>+</sup>                                               |
| Double-positive T cells                       | CD45 <sup>+</sup> CD3 <sup>+</sup> CD4 <sup>+</sup> CD8 <sup>+</sup>                                          |
| Double-negative T cells                       | CD45 <sup>+</sup> CD3 <sup>+</sup> CD4 <sup>-</sup> CD8 <sup>-</sup>                                          |
| $\alpha/\beta$ double-negative T cells        | CD45 <sup>+</sup> CD3 <sup>+</sup> CD4 <sup>-</sup> CD8 <sup>-</sup> $\alpha/\beta$ <sup>+</sup>              |
| $\gamma/\delta$ double-negative T cells       | CD45 <sup>+</sup> CD3 <sup>+</sup> CD4 <sup>-</sup> CD8 <sup>-</sup> $\gamma/\delta$ <sup>+</sup>             |
| Panel 3: T cell differentiation               |                                                                                                               |
| Thymus emigrant CD4 <sup>+</sup>              | CD45 <sup>+</sup> CD3 <sup>+</sup> CD4 <sup>+</sup> CD45RA <sup>+</sup> CD31 <sup>+</sup>                     |
| Thymus emigrant CD8 <sup>+</sup>              | CD45 <sup>+</sup> CD3 <sup>+</sup> CD8 <sup>+</sup> CD45RA <sup>+</sup> CD31 <sup>+</sup>                     |
| naive CD4 <sup>+</sup>                        | CD45 <sup>+</sup> CD3 <sup>+</sup> CD4 <sup>+</sup> CD45RA <sup>+</sup> CD45RO <sup>-</sup> CCR7 <sup>+</sup> |
| naive CD8 <sup>+</sup>                        | CD45 <sup>+</sup> CD3 <sup>+</sup> CD8 <sup>+</sup> CD45RA <sup>+</sup> CD45RO <sup>-</sup> CCR7 <sup>+</sup> |
| Effector memory CD4 <sup>+</sup>              | CD45 <sup>+</sup> CD3 <sup>+</sup> CD4 <sup>+</sup> CD45RA <sup>-</sup> CD45RO <sup>+</sup> CCR7 <sup>-</sup> |
| Effector memory CD8 <sup>+</sup>              | CD45 <sup>+</sup> CD3 <sup>+</sup> CD8 <sup>+</sup> CD45RA <sup>-</sup> CD45RO <sup>+</sup> CCR7 <sup>-</sup> |
| Central memory CD4 <sup>+</sup>               | CD45 <sup>+</sup> CD3 <sup>+</sup> CD4 <sup>+</sup> CD45RA <sup>-</sup> CD45RO <sup>+</sup> CCR7 <sup>+</sup> |

|                                                                                |                                                                                                               |
|--------------------------------------------------------------------------------|---------------------------------------------------------------------------------------------------------------|
| Central memory CD8 <sup>+</sup>                                                | CD45 <sup>+</sup> CD3 <sup>+</sup> CD8 <sup>+</sup> CD45RA <sup>-</sup> CD45RO <sup>+</sup> CCR7 <sup>+</sup> |
| Effector CD4 <sup>+</sup>                                                      | CD45 <sup>+</sup> CD3 <sup>+</sup> CD4 <sup>+</sup> CD45RA <sup>+</sup> CD45RO <sup>-</sup> CCR7 <sup>-</sup> |
| Effector CD8 <sup>+</sup>                                                      | CD45 <sup>+</sup> CD3 <sup>+</sup> CD8 <sup>+</sup> CD45RA <sup>+</sup> CD45RO <sup>-</sup> CCR7 <sup>-</sup> |
| <b>Panel 4: HLA-DR on monocytes</b>                                            |                                                                                                               |
| HLA-DR on monocytes                                                            | SSC <sup>+</sup> CD14 <sup>+</sup> HLA-DR <sup>+</sup>                                                        |
| <b>Panel 5: Regulatory T cells</b>                                             |                                                                                                               |
| Treg                                                                           | CD45 <sup>+</sup> CD3 <sup>+</sup> CD4 <sup>+</sup> CD25 <sup>+</sup> CD127 <sup>low</sup>                    |
| IL2 receptor expression                                                        | CD45 <sup>+</sup> CD3 <sup>+</sup> CD4 <sup>+</sup> CD25 <sup>+</sup>                                         |
| CD39                                                                           | CD45 <sup>+</sup> CD3 <sup>+</sup> CD4 <sup>+</sup> CD25 <sup>+</sup> CD127 <sup>low</sup> CD39               |
| <b>Panel 6: Detection of PD-1</b>                                              |                                                                                                               |
| On T lymphocytes                                                               | CD45 <sup>+</sup> CD3 <sup>+</sup> PD1 <sup>+</sup>                                                           |
| On T helper cells                                                              | CD45 <sup>+</sup> CD3 <sup>+</sup> CD4 <sup>+</sup> CD8 <sup>-</sup> PD1 <sup>+</sup>                         |
| On cytotoxic T cells                                                           | CD45 <sup>+</sup> CD3 <sup>+</sup> CD4 <sup>-</sup> CD8 <sup>+</sup> PD1 <sup>+</sup>                         |
| Blank value, 24 h blank value, 24 h anti-CD3/-CD28 stimulated                  |                                                                                                               |
| <b>Panel 7: Detection of CTLA-4</b>                                            |                                                                                                               |
| In T lymphocytes                                                               | CD45 <sup>+</sup> CD3 <sup>+</sup> CTLA4 <sup>+</sup>                                                         |
| In T helper cells                                                              | CD45 <sup>+</sup> CD3 <sup>+</sup> CD4 <sup>+</sup> CD8 <sup>-</sup> CTLA4 <sup>+</sup>                       |
| In cytotoxic T cells                                                           | CD45 <sup>+</sup> CD3 <sup>+</sup> CD4 <sup>-</sup> CD8 <sup>+</sup> CTLA4 <sup>+</sup>                       |
| Blank value, 24 h blank value, 24 h anti-CD3/-CD28 stimulated                  |                                                                                                               |
| <b>Panel 8: STAT5 phosphorylation</b>                                          |                                                                                                               |
| In T cells                                                                     | CD45 <sup>+</sup> CD3 <sup>+</sup> pSTAT5 <sup>+</sup>                                                        |
| Blank value, IL-2 stimulated, 24 h blank value, 24 h anti-CD3/-CD28 stimulated |                                                                                                               |
