# Supplementary material for: Distinct Immune Signatures Indicative of Treatment Response and Immune-Related Adverse Events in Melanoma Patients under Immune Checkpoint Inhibitor Therapy
Source: MDPI journal article supplement (doi:10.3390/ijms22158017), 2021-07-27
Supplement: s1 [file s1]

**Supplementary Table S3:** List of cell populations that showed no significant differences before or during ICI treatment regarding the comparisons of treatment response and resistance and of immune-related adverse events with no immune-related adverse events.

| Not significant markers                                                                   |                                                                                                               |
|-------------------------------------------------------------------------------------------|---------------------------------------------------------------------------------------------------------------|
| Lymphocytes perc.                                                                         |                                                                                                               |
| T-lymphocytes abs. and perc.                                                              | CD45 <sup>+</sup> CD3 <sup>+</sup>                                                                            |
| Double-positive T-cells perc.                                                             | CD45 <sup>+</sup> CD3 <sup>+</sup> CD4 <sup>+</sup> CD8 <sup>+</sup>                                          |
| Double-negative T-cells perc.                                                             | CD45 <sup>+</sup> CD3 <sup>+</sup> CD4 <sup>-</sup> CD8 <sup>-</sup>                                          |
| NK cells abs. and perc.                                                                   | CD45 <sup>+</sup> CD3 <sup>-</sup> CD16/56 <sup>+</sup>                                                       |
| NK T-cells perc.                                                                          | CD45 <sup>+</sup> CD3 <sup>+</sup> CD16/56 <sup>+</sup>                                                       |
| T-helper cells abs. and perc.                                                             | CD45 <sup>+</sup> CD3 <sup>+</sup> CD4 <sup>+</sup> CD8 <sup>+</sup>                                          |
| Cytotoxic T-cells abs. and perc.                                                          | CD45 <sup>+</sup> CD3 <sup>+</sup> CD4 <sup>-</sup> CD8 <sup>+</sup>                                          |
| Ratio CD4/CD8                                                                             |                                                                                                               |
| HLA-DR on activated NK cells perc                                                         | CD45 <sup>+</sup> CD3 <sup>+</sup> CD16/56 <sup>+</sup> CD38 <sup>+</sup> HLA-DR <sup>+</sup>                 |
| HLA-DR on NK cells perc                                                                   | CD45 <sup>+</sup> CD3 <sup>+</sup> CD16/56 <sup>+</sup> HLA-DR <sup>+</sup>                                   |
| Activated NK cells perc                                                                   | CD45 <sup>+</sup> CD3 <sup>+</sup> CD16/56 <sup>+</sup> CD38 <sup>+</sup>                                     |
| HLA-DR on cytotoxic T cells perc                                                          | CD45 <sup>+</sup> CD3 <sup>+</sup> CD4 <sup>-</sup> CD8 <sup>+</sup> HLA-DR <sup>+</sup>                      |
| Alpha/beta T-cells perc.                                                                  | CD45 <sup>+</sup> CD3 <sup>+</sup> a/b <sup>+</sup>                                                           |
| HLA-DR on monocytes perc.                                                                 | SSC <sup>+</sup> CD14 <sup>+</sup> HLA-DR <sup>+</sup>                                                        |
| Tregs perc.                                                                               | CD45 <sup>+</sup> CD3 <sup>+</sup> CD4 <sup>+</sup> CD25 <sup>+</sup> CD127 <sup>low</sup>                    |
| CD25 on T cells                                                                           | CD45 <sup>+</sup> CD3 <sup>+</sup> CD4 <sup>+</sup> CD25 <sup>+</sup>                                         |
| CD39 <sup>+</sup> Tregs perc.                                                             | CD45 <sup>+</sup> CD3 <sup>+</sup> CD4 <sup>+</sup> CD25 <sup>+</sup> CD127 <sup>low</sup> CD39 <sup>+</sup>  |
| Thymus migrant CD4 <sup>+</sup> abs. and perc.                                            | CD45 <sup>+</sup> CD3 <sup>+</sup> CD4 <sup>+</sup> CD45RA <sup>+</sup> CD31 <sup>+</sup>                     |
| Thymus migrant CD8 <sup>+</sup> abs. and perc.                                            | CD45 <sup>+</sup> CD3 <sup>+</sup> CD8 <sup>+</sup> CD45RA <sup>+</sup> CD31 <sup>+</sup>                     |
| Naive CD4 <sup>+</sup> abs. and perc.                                                     | CD45 <sup>+</sup> CD3 <sup>+</sup> CD4 <sup>+</sup> CD45RA <sup>+</sup> CD45RO <sup>-</sup> CCR7 <sup>+</sup> |
| Naive CD8 <sup>+</sup> abs.                                                               | CD45 <sup>+</sup> CD3 <sup>+</sup> CD8 <sup>+</sup> CD45RA <sup>+</sup> CD45RO <sup>-</sup> CCR7 <sup>+</sup> |
| Effector memory CD4 <sup>+</sup> abs.                                                     | CD45 <sup>+</sup> CD3 <sup>+</sup> CD4 <sup>+</sup> CD45RA <sup>-</sup> CD45RO <sup>+</sup> CCR7 <sup>-</sup> |
| Effector memory CD8 <sup>+</sup> abs.                                                     | CD45 <sup>+</sup> CD3 <sup>+</sup> CD8 <sup>+</sup> CD45RA <sup>-</sup> CD45RO <sup>+</sup> CCR7 <sup>-</sup> |
| Central memory CD4 <sup>+</sup> abs. and perc.                                            | CD45 <sup>+</sup> CD3 <sup>+</sup> CD4 <sup>+</sup> CD45RA <sup>-</sup> CD45RO <sup>+</sup> CCR7 <sup>+</sup> |
| Central memory CD8 <sup>+</sup> abs. and perc.                                            | CD45 <sup>+</sup> CD3 <sup>+</sup> CD8 <sup>+</sup> CD45RA <sup>-</sup> CD45RO <sup>+</sup> CCR7 <sup>+</sup> |
| Effector CD4 <sup>+</sup> abs.                                                            | CD45 <sup>+</sup> CD3 <sup>+</sup> CD4 <sup>+</sup> CD45RA <sup>+</sup> CD45RO <sup>-</sup> CCR7 <sup>-</sup> |
| Effector CD8 <sup>+</sup> abs.                                                            | CD45 <sup>+</sup> CD3 <sup>+</sup> CD8 <sup>+</sup> CD45RA <sup>+</sup> CD45RO <sup>-</sup> CCR7 <sup>-</sup> |
| Extracellular PD1 on T-lymphocytes cells (blank value 0h)                                 | CD45 <sup>+</sup> CD3 <sup>+</sup> PD1 <sup>+</sup>                                                           |
| PD1 on T-helper cells (blank value 0h, after 24h and 24h anti-CD3/-CD28 stimulated)       | CD45 <sup>+</sup> CD3 <sup>+</sup> CD4 <sup>+</sup> CD8 <sup>+</sup> PD1 <sup>+</sup>                         |
| PD1 on cytotoxic T cells (24h anti-CD3/-CD28 stimulated)                                  | CD45 <sup>+</sup> CD3 <sup>+</sup> CD4 <sup>+</sup> CD8 <sup>-</sup> PD1 <sup>+</sup>                         |
| CTLA4 on T cells (blank value 0h, after 24 h and 24h anti-CD3/-CD28 stimulated)           | CD45 <sup>+</sup> CD3 <sup>+</sup> CTLA4 <sup>+</sup>                                                         |
| CTLA4 in T helper cells (blank value 0 h, after 24h and 24h anti-CD3/-CD28 stimulated)    | CD45 <sup>+</sup> CD3 <sup>+</sup> CD4 <sup>+</sup> CTLA4 <sup>+</sup>                                        |
| CTLA4 in cytotoxic T-cells (blank value 0 h, after 24h and 24h anti-CD3/-CD28 stimulated) | CD45 <sup>+</sup> CD3 <sup>+</sup> CD8 <sup>+</sup> CTLA4 <sup>+</sup>                                        |
| Perc. T cells pStat5A 15 min IL2 stimulated, 24 h anti-CD3/-CD28 stimulated               | CD45 <sup>+</sup> CD3 <sup>+</sup> STAT5 <sup>+</sup>                                                         |
| Mean number of T cells pStat5A 24 h blank value, 24 h anti-CD3/-CD28 stimulated           | CD45 <sup>+</sup> CD3 <sup>+</sup> STAT5 <sup>+</sup>                                                         |

Perc., percentage; abs., absolute number
