# Supplementary material for: Distinct Immune Signatures Indicative of Treatment Response and Immune-Related Adverse Events in Melanoma Patients under Immune Checkpoint Inhibitor Therapy
Source: Int J Mol Sci. 2021 Jul 27;22(15):8017. doi: 10.3390/ijms22158017 (PMC8348898; doi:10.3390/ijms22158017)
Supplement: Supplementary file 1 [file ijms-22-08017-s001.zip]

Archive with 5 entries (5 files):
- 01_Supplementary Figures_summary_rev_20072021x.pdf
- 01_Supplementary Table 1 antibodies_28102020x.pdf
- 02_Supplementary Table 2 Panels_28102020x.pdf
- 03_Supplement Table 3 Not Significant_25052021x.pdf
- 04_Supplementary Table 4_FCM_Raw_data_complete_19072021x.xlsx
