# Supplementary material for: Distinct Immune Signatures Indicative of Treatment Response and Immune-Related Adverse Events in Melanoma Patients under Immune Checkpoint Inhibitor Therapy
Source: Int J Mol Sci. 2021 Jul 27;22(15):8017. doi: 10.3390/ijms22158017 (PMC8348898; doi:10.3390/ijms22158017)
Supplement: Supplementary file 1 [file ijms-22-08017-s001.zip › 04_Supplementary Table 4_FCM_Raw_data_complete_19072021x.xlsx]

## Sheet: checkpoint_data
Table S4: Summary of flow cytometry raw data.
ID	Timepoint	Extra_0h_PD1_CD279_on_CD3	Extra_0h_PD1_CD279_on_CD4	Extra_0h_PD1_CD279_on_CD8	Extra_24h_Stimulation_PD1_CD279_on_CD3_blank value	Extra_24h_Stimulation_PD1_CD279_on_CD3_CD2/28	Extra_24h_Stimulation_PD1_CD279_on_CD4_blank value	Extra_24h_Stimulation_PD1_CD279_on_CD4_CD2/28	Extra_24h_Stimulation_PD1_CD279_on_CD8_blank value	Extra_24h_Stimulation_PD1_CD279_on_CD8_CD2/28
Patient 1	1	39	26.3	11.2	36.7	85.3	23.2	63.9	12.1	18.9
Patient 2	1	44.9	22	23.6	35.3	70.8	22.4	49.3	10.8	20.1
Patient 3	1	33	40.7	17.7	22.1	75.1	26.6	80.7	9.7	66
Patient 4	1	13.3	12	17.2	15.3	68.2	12.2	65.1	18.6	68
Patient 5	1	26.2	31.5	22.5	22.3	61.3	23.7	78.3	22.9	69.3
Patient 6	1	33.1	31.1	39.9	21	66.7	19.4	71.8	29.5	55.4
Patient 7	1	26.5	20.5	37.1	23.6	83.1	19.7	86.5	31.3	74.4
Patient 8	1	41	25.7	66.5	35.1	67.7	22.5	76.8	63.1	86.4
Patient 9	1	1.9	1.1	0.8	30.9	78.6	31.1	84.7	31.6	78.6
Patient 10	1	44.9	40.3	48.1	NA	NA	NA	NA	NA	NA
Patient 12	1	39.9	36.6	42.7	31.1	65.5	79.6	89.2	16.7	95.6
Patient 13	1	23.1	74.2	10	19.9	29.9	70.3	84.6	8.8	20.1
Patient 14	1	36.1	36.6	29.3	33.9	72.4	34.5	84.1	27.5	77.6
Patient 15	1	14	11.2	18.9	9.9	72.8	9.3	87.5	19.3	81.4
Patient 16	1	21.8	19.1	22.5	17.7	70.2	16.6	74.2	21.6	72.7
Patient 17	1	26.6	25.7	26.7	23.5	85	23.5	88.7	26.1	85.1
Patient 1	2	2.3	3.8	0.1	12.8	61.2	7.9	47.1	4	13
Patient 2	2	0.7	0.3	0.5	34.6	62.6	23.7	47.3	13.4	19
Patient 3	2	2.9	4.7	1	0.1	44.2	2.3	77	0.3	69.3
Patient 4	2	2.6	2.7	8.4	1.8	74.1	1.5	74.6	3.1	72.6
Patient 5	2	0.1	0.1	0.1	1.3	28.1	1.4	37.3	0.3	12.7
Patient 6	2	7	6.6	10.2	4.9	70	4.8	78.4	10.1	51.7
Patient 7	2	2	0.1	2	22.8	80.3	19.7	82.9	33.9	73.1
Patient 8	2	1.6	1.5	1.5	16.6	49.3	5.9	54.2	32.9	67.8
Patient 9	2	0.5	0.3	0.2	29.3	72.4	28.7	75.8	30.3	66.8
Patient 10	2	7.8	6.5	18.1	36.6	90.6	36.5	93.3	35.7	84.5
Patient 11	2	4.9	7.3	6.2	29.8	39.5	37.1	26.3	25.1	59.6
Patient 12	2	0.1	0	0.1	0.1	0	0	0	0.1	0.1
Patient 13	2	0.1	0.1	0	15.5	40.1	38.5	83.6	6	27.9
Patient 14	2	1.7	2.1	1.3	24.5	73.6	28.1	82.8	21.1	75.1
Patient 15	2	0.3	0.2	0.6	10.7	70.4	7.7	80.3	18.4	77.8
Patient 16	2	0.6	0.5	0.4	17.5	57.1	15.7	60.3	19.8	56.8
Patient 17	2	0.3	0	0.1	24.6	78.2	22.2	80.4	28.6	74.2
Patient 1	3	3.2	3.3	1	30.3	78.3	17.9	62.3	8.6	14.4
Patient 2	3	8.9	5.8	12.2	40.9	86.8	36.3	94.6	46.8	89.9
Patient 3	3	8.1	10.3	1.8	6.3	58.9	7	88.4	2.2	81
Patient 4	3	0.1	0	0.8	2.9	63.9	2	68.8	4.9	71.7
Patient 5	3	6.1	9.9	2.9	18.2	73.9	20.6	83.9	13.5	60.9
Patient 6	3	9.7	5.8	18.4	15	87	14	93.5	30.8	66.3
Patient 7	3	8.9	5.7	17.2	28.8	72.5	23	73.4	43.2	78.9
Patient 8	3	2.2	5.4	2.7	36.6	80.4	17.6	82.5	55.1	86.7
Patient 9	3	0.2	0.8	0.3	NA	NA	NA	NA	NA	NA
Patient 10	3	6.4	8.8	7.8	36.9	84.1	37.6	89.2	38.6	74.7
Patient 11	3	3.6	4.4	1.8	37.4	69.7	38.3	86.8	33.5	70
Patient 12	3	0.1	0.1	0.2	25.3	75	23.8	91.3	37.5	87.1
Patient 13	3	NA	NA	NA	NA	NA	NA	NA	NA	NA
Patient 14	3	0.9	1	1.9	9.8	70	10.6	74.7	13.4	73.1
Patient 15	3	0.1	0.3	0.8	8.2	80.8	6.7	89.1	14.2	82.8
Patient 16	3	0.7	0.2	0.4	19.4	74.8	18.4	79	18.9	72.3
Patient 17	3	2.8	2.3	2.4	17.7	67.8	17.5	72.7	18.6	72.8
Patient 1	4	0.1	0.1	0	35.4	70.3	35.1	86.2	37.5	80.4
Patient 2	4	0.7	0.6	0.8	63.6	77.2	69.5	97.7	65.4	93.3
Patient 3	4	0	0	0.1	11.1	76.7	11.1	83	7.2	79
Patient 4	4	5.6	4.6	16.5	5.2	51.6	3.5	58.7	12.3	70.8
Patient 6	4	0	0.1	0	6.2	69.3	4.3	76.2	15.1	62.4
Patient 7	4	23	15.2	40.5	27.1	36.4	23.1	38.2	44.1	54.1
Patient 8	4	33.3	18.6	56	33.6	63.2	20.8	74.9	54.8	82.6
Patient 9	4	2.7	1.9	1.4	31	61.9	35.9	67.3	31.7	53.3
Patient 10	4	0	0	0	30.4	81.1	30.3	89.8	33.8	78
Patient 11	4	0.1	0.2	0.1	31.7	63.3	29.9	65.2	32.7	63.5
Patient 12	4	1.5	1.2	1.1	14.8	47.7	11.2	43.4	31.7	53.5
Patient 13	4	NA	NA	NA	NA	NA	NA	NA	NA	NA
Patient 14	4	NA	NA	NA	NA	NA	NA	NA	NA	NA
Patient 15	4	0.1	0.1	0.4	5.2	73.5	4.5	87.2	13.1	81.8
Patient 16	4	23.8	20.7	28.5	22.7	58.7	20.5	60.6	25.8	56.1
Patient 17	4	0.1	0	0.4	11.4	64.7	10.6	68.1	19	55.6

## Sheet: immune_status_data
Table S4: Summary of flow cytometry raw data.
ID	Timepoint	Leukocytes_abs	Lymphocytes_perc	Lympho_abs	Bcells_perc	Bcells	Tcells_perc	Tcells	double_positive_Tcells_perc	double_negative_Tcells_perc	NKcells_perc	NKcells	NKTcells_perc	THelpercellsCD4_perc	THelpercellsCD4	cytotoxTcellsCD8_perc	cytotoxTcellsCD8	CD4CD8Ratio	HLADR_CD38_NK_perc	HLADR_NK_perc	CD38_NK_perc	HLADRCD38CD8_perc	CD38_CD8_perc	HLADR_CD8_perc	HLADR_CD38_CD4_perc	CD38_CD4_perc	HLADR_CD4_perc
Patient 1	1	7.3	20.1	1.5	15.3	229.5	57.2	858	1.1	5.7	27.2	408	7.3	37.1	556.5	16.2	243	2.29012	1.1	3.5	95.8	3.2	24.8	20.7	3.2	44	11.4
Patient 2	1	6.5	7.9	0.5	16.7	83.5	62.6	313	2.1	3.1	19.8	99	2.2	40.2	201	19	95	2.11579	2.4	18.7	80.9	26.5	33.8	7.4	10	34.1	24.6
Patient 3	1	6.6	18.1	1.2	19.8	237.6	52.3	627.6	4.9	6.3	27	324	10.4	29.4	352.8	16.4	196.8	1.79268	24.5	28.2	96.2	14.9	33.2	17.6	8.6	33.2	17.6
Patient 4	1	6.9	27.2	1.9	8.7	165.3	78.4	1489.6	0.3	2.5	11.8	224.2	4.5	64.8	1231.2	11.4	216.6	5.68421	3.6	13.5	89.1	4.4	69.5	5	2.1	78.5	3.7
Patient 5	1	9.8	27.3	2.7	5.9	159.3	89.1	2405.7	0.4	4	4.8	129.6	7.7	31.4	847.8	53.3	1439.1	0.589118	4.9	12.1	91.2	48.4	92.8	50.7	20.5	76.3	28.3
Patient 6	1	7.7	14.7	1.1	3.8	41.8	74.4	818.4	0.8	1.5	21.1	232.1	5.9	56	616	16.5	181.5	3.39394	4.3	26.7	74.5	13.2	39	21.4	4.3	47.8	9.4
Patient 7	1	7.7	21.6	1.7	44.2	751.4	40.9	695.3	0.5	1.7	15.8	268.6	5.8	29.2	496.4	10.7	181.9	2.72897	1.4	13.1	86.5	10.7	31.8	21.7	4.2	64	9.3
Patient 8	1	4.4	22	1	13.1	131	76.9	769	2.6	7	9.9	99	18.6	37	370	32.4	324	1.14198	3.6	24.6	76.8	6.9	31.9	22.7	2.7	54.6	9.1
Patient 9	1	5.2	23.5	1.2	11.6	139.2	79.3	951.6	1.5	4.4	8.8	105.6	5.5	48.6	583.2	25.1	301.2	1.93625	10.4	14.8	90	13.7	33.4	20	3.3	46.7	5.5
Patient 10	1	3.1	25	0.8	10.6	84.8	77.9	623.2	0.7	7	10.8	86.4	3.6	51.2	409.6	20.3	162.4	2.52217	5	20.7	77.9	13.2	54.3	27	2.1	45.6	6.2
Patient 11	1	10.2	6	0.59	17	100.3	48.4	285.56	3.3	8.4	27.8	164.02	6.8	42.7	251.93	45.6	269.04	0.936404	NA	NA	NA	NA	NA	NA	NA	NA	NA
Patient 12	1	8.7	5	0.4	13.9	55.6	66.3	265.2	0.5	2.7	19.7	78.8	2.5	54.2	216.8	9.8	39.2	5.53061	3.4	7.9	93.5	5	41.9	13.7	3.1	40	9.4
Patient 13	1	9.6	30.7	2.9	1.2	34.8	92	2668	1.7	7.4	6.3	182.7	1	15.6	452.4	67.8	1966.2	0.230088	25.5	38.1	86.1	42.7	80.2	54	28.4	45	50.2
Patient 14	1	7.2	11.5	0.8	6.7	53.6	70.1	560.8	1.3	6.9	22.5	180	6	42.4	339.2	21.8	174.4	1.94495	5.7	20	56.6	13.8	37.2	31.1	4.2	37	10.7
Patient 15	1	6.4	15.4	1	10	100	57.9	579	0.3	3.5	31.9	319	0.9	50.7	507	4.7	47	10.7872	8.7	14.3	91.8	8.5	52.3	17.3	2.8	75.8	7.9
Patient 16	1	6.4	31	2	10.4	208	74.1	1482	1.3	4.6	14.5	290	1.2	50.6	1012	18.9	378	2.67725	2.1	5.3	94.2	6.3	39.1	12.7	1.8	48.1	4.7
Patient 17	1	7.4	20.8	1.5	8.3	124.5	77.4	1161	1.3	1.6	13.8	207	1.1	59.4	891	15.4	231	3.85714	0.8	13.7	79.3	4.2	12.5	13.9	1.1	20.1	6.1
Patient 1	2	6.9	17.5	1.2	17.6	211.2	63.3	759.6	0.8	4	18.6	223.2	5.1	44.4	532.8	15.7	188.4	2.82803	1.5	7.4	92.5	8.8	20.8	23.8	3.2	47.2	11.1
Patient 2	2	6.6	9.8	0.6	16.4	98.4	62.1	372.6	2.3	3.2	20.9	125.4	1.9	39.1	234.6	19.5	117	2.00513	3	25.2	74.6	24.8	45.9	8.4	8.4	32.7	23.9
Patient 3	2	5.9	20.2	1.2	24.5	294	55.2	662.4	3.8	6.2	19.6	235.2	5.5	34.3	411.6	15.3	183.6	2.24183	6.6	12.3	93.9	15.8	38	18.9	6.7	53	15
Patient 4	2	6.5	30	2	7.7	154	77.6	1552	0.4	2	14.1	282	6.6	63.4	1268	12.3	246	5.15447	5.6	16.1	88.6	4.2	66.7	5.2	2.8	79.8	4.8
Patient 5	2	8.6	26.5	2.3	6.7	154.1	87.2	2005.6	0.1	4.8	5.6	128.8	8.8	33.4	768.2	49	1127	0.681633	7.4	20.1	85.3	62	95.8	63.6	20.1	79	27.3
Patient 6	2	7.7	18.5	1.4	3.7	51.8	80.4	1125.6	0.6	1.3	15.2	212.8	4.3	63.6	890.4	15.2	212.8	4.18421	1.4	10.8	81.3	5.7	38	7.3	3.4	54.5	6.8
Patient 7	2	8.3	21.6	1.8	35.1	631.8	48.8	878.4	0.6	1.3	13.6	244.8	5.2	35.1	631.8	12.6	226.8	2.78571	1	8.2	91.1	12.2	36.5	23.9	4.5	60.3	10.7
Patient 8	2	3.9	22.9	0.9	12.3	110.7	76.6	689.4	2.3	10.2	11	99	17.8	38.9	350.1	27.9	251.1	1.39427	3	17.3	83.4	11.1	29.8	39.8	2.2	51.8	10.3
Patient 9	2	6	24.5	1.5	11.7	175.5	78.8	1182	1.5	3.8	9	135	4.6	50	750	24.5	367.5	2.04082	9.7	14	90.5	12.9	42.9	17.8	3.5	48.4	5.8
Patient 10	2	4.4	30.2	1.3	11.8	153.4	76.9	999.7	0.8	7	10.8	140.4	3.5	50.7	659.1	19.4	252.2	2.6134	2.9	7.5	89.6	14	54	29.6	3.1	44.1	7.5
Patient 11	2	9.3	9.1	0.8	24.9	199.2	58.4	467.2	3.2	9.7	16.4	131.2	3.8	21.5	172	29	232	0.741379	3.9	8.5	94.8	19.8	38.9	29.2	5.3	38.4	12.1
Patient 12	2	8.4	6.6	0.6	14.4	86.4	72.3	433.8	0.4	2.8	12.4	74.4	0.9	59.2	355.2	10.8	64.8	5.48148	2	7.3	91.9	4.7	34.8	12.5	2.5	35.8	7.8
Patient 13	2	6.5	10.5	0.7	3.6	25.2	91	637	1.2	7	4.9	34.3	0.3	19.4	135.8	64.2	449.4	0.302181	20.5	29.2	88	28.8	69.7	38.1	21.8	42.6	34.6
Patient 14	2	7.8	10.6	0.8	7.3	58.4	76.7	613.6	1.4	4.4	15.4	123.2	4.8	49.3	394.4	22.9	183.2	2.15284	7.9	26.1	55.9	9.5	26.1	28.6	3.2	31	10.4
Patient 15	2	6.2	16.3	1	10.2	102	64.1	641	0.2	2.6	26	260	2.1	56.9	569	5.3	53	10.7358	5	12.1	89.3	9.7	48	21	2.7	72.7	8.3
Patient 16	2	5.6	32.6	1.8	13.3	239.4	72.8	1310.4	1.2	4.5	13.3	239.4	1.9	50.7	912.6	17.9	322.2	2.8324	1.5	5.5	92.1	7.2	38.8	18.5	2.1	48.1	6.6
Patient 17	2	7.4	26.9	2	8.2	164	78.5	1570	1.3	1.5	12.8	256	0.9	59.9	1198	16.2	324	3.69753	0.9	8.9	84.4	1.1	15	8.4	1.1	21.8	4.3
Patient 1	3	6.1	27.8	1.7	16.6	282.2	63.9	1086.3	0.7	4.9	19.1	324.7	7.2	43.8	744.6	16.2	275.4	2.7037	1.4	5.6	93.7	8.6	28.9	15.3	3.4	52.4	8.8
Patient 2	3	7.5	6	0.5	11.8	59	63.9	319.5	1.8	3.2	23.8	119	1.9	32.7	163.5	27.7	138.5	1.18051	7.4	21.5	84.3	58.3	75.8	66	19.9	50.4	35.8
Patient 3	3	6.6	9.2	0.6	21.2	127.2	51.7	310.2	3.1	6.8	24.8	148.8	5.9	34.9	209.4	11.5	69	3.03478	6.7	15.3	91.1	21	50	24.9	18	67.6	25.8
Patient 4	3	5.9	24.7	1.5	8	120	75.3	1129.5	0.4	3.2	16.4	246	6.3	58.8	882	13.6	204	4.32353	6.1	18.7	86.3	6.7	66	8.2	5.4	82.4	7.8
Patient 5	3	10.3	12.3	1.3	7.1	92.3	84.9	1103.7	1.2	4.3	7.3	94.9	5.5	30.8	400.4	49.1	638.3	0.627291	9.3	30.4	78.2	48.6	95.6	50.1	22	88.1	26.5
Patient 6	3	8.8	11.3	1	4.7	47	75.4	754	1.2	1.7	18.9	189	4.3	55.7	557	17.3	173	3.21965	3.3	21.7	77.5	26.7	48.5	42.3	7.2	57.4	12.9
Patient 7	3	6.2	38.9	2.4	23.2	556.8	61.5	1476	0.6	2.5	12.9	309.6	2.3	42.2	1012.8	17.3	415.2	2.43931	4	14.2	89.3	51	70.4	58.4	13.1	68.1	20.5
Patient 8	3	5.5	17.9	1	10.3	103	75.6	756	2.5	10.5	13.7	137	18.1	35.2	352	30.5	305	1.1541	10.5	41.3	66.8	13.4	37	32.1	5.2	56.4	11.9
Patient 9	3	8.5	13.7	1.2	9.5	114	77.3	927.6	1.6	4.7	12.7	152.4	4.9	47.2	566.4	24.8	297.6	1.90323	5.2	13.5	85.3	17.9	63.7	20.7	5.4	56.8	8.4
Patient 10	3	4.5	29.2	1.3	8	104	75	975	0.9	7.9	16.5	214.5	3	49.9	648.7	18.3	237.9	2.72678	2.6	20.8	78.5	19.6	61	35	10.2	54.9	18.4
Patient 11	3	9.7	23	2.2	9.6	211.2	77.5	1705	2.8	8	12.7	279.4	5.7	30.4	668.8	38.7	851.4	0.78553	7.5	9.6	97.5	44	55.6	54.6	16.6	53.3	25.4
Patient 12	3	7.5	7	0.5	11.7	58.5	72.8	364	0.6	3.5	14.9	74.5	1	57.5	287.5	12.2	61	4.71311	3.3	11.1	89	9.3	36.5	16.7	5.1	41.3	10
Patient 13	3	NA	NA	NA	NA	NA	NA	NA	NA	NA	NA	NA	NA	NA	NA	NA	NA	NA	NA	NA	NA	NA	NA	NA	NA	NA	NA
Patient 14	3	6.9	11.4	0.8	5.4	43.2	77.1	616.8	1.2	4.4	16.8	134.4	5.1	49.4	395.2	23.2	185.6	2.12931	10.8	23.1	61.4	15.4	33.9	35.3	5.5	36.4	12.1
Patient 15	3	6	20.8	1.2	9.7	116.4	60.4	724.8	0.3	3.7	30.4	364.8	2.3	52.9	634.8	4.9	58.8	10.7959	5.1	10.6	91.6	9.9	52.3	15.3	4.8	79.3	8.9
Patient 16	3	5.8	28.3	1.6	7.3	116.8	78.5	1256	1	4.2	13.4	214.4	1.7	58.7	939.2	15.5	248	3.7871	2.9	18.7	82.8	20.7	55.8	30.8	12.7	55.8	24.1
Patient 17	3	6.7	19.9	1.3	5.1	66.3	79.3	1030.9	1.1	2.2	15	195	1	61.5	799.5	14.8	192.4	4.15541	2.8	19.4	79.7	9.3	25	18.2	5.5	35.6	12.4
Patient 1	4	9.6	19.8	1.9	10.3	195.7	52.3	993.7	1.2	6.7	37.5	712.5	8.3	31.6	600.4	16.4	311.6	1.92683	1.9	3.9	96.7	14.9	29.4	26.9	5.9	47.5	15.1
Patient 2	4	6	14.1	0.8	13.8	110.4	62.2	497.6	2	2.9	23.4	187.2	1.6	32.2	257.6	26.9	215.2	1.19703	8.4	21.3	85.3	32.3	53.1	47.1	9.8	36.7	23.2
Patient 3	4	8.6	8.5	0.7	22.6	158.2	51.7	361.9	4.3	6.6	24.4	170.8	2.8	31.4	219.8	14.4	100.8	2.18056	2.9	9.1	92.6	12.5	39.8	15.4	7.3	57.5	12.7
Patient 4	4	7.1	18.5	1.3	7.6	98.8	71.8	933.4	0.5	3.2	20	260	6.3	55	715	14.1	183.3	3.90071	2.9	10.9	91.6	12.1	71.3	14	5	74.8	8.3
Patient 6	4	7.9	13.6	1.1	4.3	47.3	77.4	851.4	0.5	1.3	17.6	193.6	2.6	61.5	676.5	14.4	158.4	4.27083	1.7	10.9	83	5.2	30.1	7.3	3.7	52.5	7.1
Patient 7	4	7.3	40.3	2.9	35.9	1041.1	50	1450	0.5	2.5	11.7	339.3	3.5	32.5	942.5	16	464	2.03125	2.2	6.5	95.3	26.5	46.6	47	3.7	57	12
Patient 8	4	5.6	16.7	0.9	8.1	72.9	72.5	652.5	2.9	11.7	19	171	23.4	25.2	226.8	36.5	328.5	0.690411	8.9	37.6	69	18.6	41.3	41.4	6.7	48	20.2
Patient 9	4	9.3	16.4	1.5	11	165	75.4	1131	1.6	3.6	13.7	205.5	6.8	45.3	679.5	25.7	385.5	1.76265	9.1	16.7	86.7	20.8	59.2	26.3	7.89	54.9	13.5
Patient 10	4	5.5	22.9	1.3	8.7	113.1	74.2	964.6	0.6	7.8	16.7	217.1	3.3	49.5	643.5	18.2	236.6	2.71978	4.2	22.5	79.1	20.7	63.3	32.5	3.6	41.8	12.6
Patient 11	4	5.7	33.3	1.9	6.3	119.7	81.2	1542.8	3.3	7.5	12.3	233.7	4.1	29.4	558.6	43	817	0.683721	3.9	24.5	78.5	39.2	56.4	53.6	12.6	52.3	29.6
Patient 12	4	4.5	11.4	0.5	4	20	56.9	284.5	2.5	8.8	37.6	188	1	131.4	657	18.3	91.5	7.18033	13	13	99.9	66.2	83.7	68.2	15	52.9	20
Patient 15	4	6.9	20.9	1.4	11.4	159.6	61	854	0.3	3.4	27.3	382.2	2.5	53.1	743.4	5.5	77	9.65455	3.8	10	90.1	9.8	51.1	17.6	5.5	73.9	10.9
Patient 16	4	5.7	32.4	1.8	8.7	156.6	72.7	1308.6	0.8	6.1	18.3	329.4	3.5	48.9	880.2	18.6	334.8	2.62903	2.9	6.3	95.8	25.6	65.5	33.5	4.7	56	10.4
Patient 17	4	11.4	14.1	1.6	6.2	99.2	68.8	1100.8	1.4	3.4	24.4	390.4	1.6	46.9	750.4	18.4	294.4	2.54891	1.5	5	95.7	21.9	41.8	28.2	2.5	29.4	6.9

## Sheet: mono_treg_data
Table S4: Summary of flow cytometry raw data.
ID	Timepoint	alpha_beta_perc	gamma_delta_perc	HLADR_Monocytes_perc	CD25_Tcells_perc	Tregs_perc_TC	CD39_Treg_perc_Treg	pSTAT5A_blank_value_perc_TC8	pSTAT5A_IL2_15min_stimulated_perc_TC	pSTAT5A_blank_value_perc_TC	pSTAT5A_CD3/28_24h_stimulated_perc_TC	pSTAT5A_blank_value_Mean_TC	pSTAT5A_IL2_15min_stimulated	pSTAT5A_blank_value_Mean_TC	pSTAT5A_CD3/28_24h_stimulated_Mean_TC
Patient 1	1	94.2	5.3	98.8	42.6	6.6	41	1.3	49.9	11.7	86.5	268	1321	406	3372
Patient 2	1	97.9	1.6	97.2	65.3	12.3	14.2	70.3	97.2	16	86.8	1453	3042	361	3078
Patient 3	1	96.2	3	97	68.9	9.6	53.1	0.1	18.3	1.4	31.1	710	2250	597	2034
Patient 4	1	98.9	0.8	95.8	44.5	7	44.3	0	46.5	19.1	75	332	1887	613	2802
Patient 5	1	95.9	3.6	99.2	15.2	2	11.3	0.3	43.5	2.8	76.1	292	2020	118	1782
Patient 6	1	98.6	0.8	94.7	49.3	5.9	23.1	1.5	53.7	2.2	82.8	556	2101	208	2700
Patient 7	1	97.9	0.4	99.3	50.4	6.8	8.5	1	96.2	0.8	68.9	312	2782	305	2536
Patient 8	1	97.7	2.1	98.3	30	4.5	11.4	3.4	70.8	NA	70.5	347	1852	NA	2566
Patient 9	1	96.2	3.4	96	35.3	3.9	50.6	1	82.9	4.1	79	408	2686	376	4182
Patient 10	1	97.1	2.5	99.3	41.6	5	46.9	1.2	16.8	3.2	70	442	1165	261	3570
Patient 12	1	97.3	1.7	99.7	52.2	8.8	8.5	11.2	70.7	6.1	90.5	1997	3632	295	3728
Patient 13	1	92.6	7.2	97.6	7.5	0.6	72.6	2.1	69.8	1.7	52.6	186	1016	156	1548
Patient 14	1	98.8	1.1	99.7	56.6	6.1	12.4	75.3	92.2	2.6	89	1686	3176	356	4909
Patient 15	1	97	2.6	97.2	74.6	7.7	51.1	2.9	84.4	4.8	66.3	676	2887	296	2333
Patient 16	1	96.3	3.3	99.6	44.1	6.1	54.3	1	69.2	2.6	86.6	427	2637	162	3555
Patient 17	1	98.7	1.1	100	72.3	6	52.8	2.7	91.6	5.1	91.3	653	3312	356	5917
Patient 1	2	96.5	3.2	100	46.2	6.7	41.7	4.1	57.4	11.6	85.5	249	849	354	3706
Patient 2	2	97.2	2	98.9	65	12.6	13.8	73.9	98.4	17.2	88.8	1683	3147	379	3147
Patient 3	2	96.3	3.3	96.7	72.7	10	50.5	1	44.2	0.9	37.4	945	2757	510	2460
Patient 4	2	98.8	1	99.3	43.8	7.1	42.5	0.3	31.7	19.8	73.6	439	1618	515	2994
Patient 5	2	95.4	4.1	99.4	14.5	2.1	9.3	32.8	99.3	2.7	75.8	593	2289	139	1622
Patient 6	2	98.8	0.9	97.4	48.6	5.7	21.1	4.5	64.7	5.4	85.4	802	2402	224	2798
Patient 7	2	99	0.6	100	54.5	6.6	9	1.3	43.3	2.1	75.6	661	1964	355	2771
Patient 8	2	97.7	2	98.8	33.3	4.7	11	3.8	31.8	2	47.9	446	1248	157	1459
Patient 9	2	96.1	3.3	99.2	38.9	4	49.3	2.2	43.9	2.3	59.9	669	1968	753	3895
Patient 10	2	97.1	2.7	100	38.9	4.9	45.2	0.9	63.2	3.6	80.6	163	872	426	5175
Patient 12	2	98.3	1.6	97.3	59.1	9.4	6.5	2.1	47.9	7.1	83.1	270	756	293	3131
Patient 13	2	93.6	6.2	96.5	20.2	2.2	71.7	1.2	25.4	0.9	80	387	1622	115	2327
Patient 14	2	99	0.7	99.8	63.4	6.1	13.3	76.3	98.4	5.8	91.6	1209	3669	402	5018
Patient 15	2	98	1.6	99.3	62.8	6.1	63.1	2.4	91.5	8.2	63.5	734	2734	461	2367
Patient 16	2	96.6	3	99.7	41.8	5.6	58.5	2.2	72.5	1.4	80.8	697	2948	128	2990
Patient 17	2	98.5	1.2	100	68.5	6.1	56.3	0.6	89.6	3.8	91	402	3091	280	5343
Patient 1	3	94.4	5.3	97.7	40.7	6.4	41.3	1.9	46.1	2.5	59.4	304	1618	237	1806
Patient 2	3	96.5	3.2	98.5	45.1	8.6	7.6	54.3	74.1	0.7	86	767	1562	304	2380
Patient 3	3	96	3.1	95.9	65.6	9.9	66.1	65.3	96.1	5.8	66.1	1232	2450	246	1837
Patient 4	3	98.4	1.3	98.4	38.2	7.5	55.3	1	70.5	5.3	69.5	435	1987	202	1659
Patient 5	3	95.9	3.8	100	15.2	2.4	12.4	33.6	88	0.1	66.1	519	1402	175	2930
Patient 6	3	98.1	1.2	91.4	40.1	6.5	29.5	4.2	29.3	0.1	63.1	370	744	164	3209
Patient 7	3	98.9	0.6	100	43.5	5.5	7.9	1.5	81.5	3.1	52.4	568	3180	196	2045
Patient 8	3	97.6	1.9	98.1	30.2	5.2	14.2	2.4	44	1.9	85	220	878	208	4215
Patient 9	3	95.1	4.2	98	37.2	5.4	60.6	1.5	69.7	NA	NA	566	2637	NA	NA
Patient 10	3	97	2.9	99.2	35.1	6.7	53.1	2.2	78	4.6	65.6	533	2309	329	2961
Patient 11	3	96	3.9	99.2	37.8	3.9	64.7	51.9	92.7	0.6	86.6	814	2607	223	3409
Patient 12	3	97.9	1.8	98.9	56.1	10.1	7.8	3.3	79.9	3.6	83.6	1281	4121	249	3483
Patient 14	3	99	0.8	99.9	57.9	4.9	16	1.9	89.6	4.3	92.8	556	3243	271	4103
Patient 15	3	97.6	2.1	99.5	65	6.3	63.1	3.9	85.9	4.8	70.6	673	2925	298	2637
Patient 16	3	97.4	2.4	100	45.4	11.1	75.4	1.4	86.1	4.3	84.6	440	3331	277	4867
Patient 17	3	98.5	1	99.5	65.4	9.7	61.1	0.7	86.6	7.9	90.1	456	3060	289	3759
Patient 1	4	93.2	6.4	95.8	32.3	5	41.9	8.9	8.8	21.3	45.7	179	431	149	631
Patient 2	4	97.3	2.4	99.6	48.1	10.7	11.3	68.8	87	2.8	72.6	1941	3111	197	2800
Patient 3	4	95.2	4.1	98.7	73.6	12.1	40.7	4	64.1	12.4	42.4	258	1869	368	1292
Patient 4	4	98.4	1.4	97.5	45.5	6.4	52.7	3.9	67.3	4	79.9	399	1929	197	2864
Patient 6	4	98.9	0.9	92.7	46.7	6.1	27.1	12.2	49.7	3.7	73.2	276	910	129	1425
Patient 7	4	98.8	0.9	99.7	40	6.2	4.7	1.2	56	3	39.9	577	2654	266	2416
Patient 8	4	97.4	2.4	99.7	19.4	4.4	9.7	1	90	0.5	74.4	215	1909	208	3802
Patient 9	4	95.2	4.4	98.8	33.8	5.3	61.3	NA	NA	2.9	69.7	NA	NA	291	3765
Patient 10	4	96.5	3.3	98.7	30.6	4.5	45.1	64.9	98.8	0.1	77.4	845	2791	213	4586
Patient 11	4	95.7	3.3	100	939.1	4.5	57.8	2.4	92.8	1.9	92	515	3658	154	2854
Patient 12	4	93.4	5.7	99.3	32.8	6.2	15.4	67.2	96.7	0.6	60.2	1378	2089	136	2043
Patient 15	4	97.9	1.9	100	64.1	6.8	63.2	4.3	55.8	8.6	70.5	608	1543	394	2719
Patient 16	4	95.5	3.8	99.7	32.4	7.6	56.3	6.8	87.6	1.1	52.5	1055	4127	236	1580
Patient 17	4	96.9	2.6	99.4	60.5	6.3	59	0.8	77.9	0.4	41.3	528	1671	313	1064

## Sheet: tcell_differentiation_data
Table S4: Summary of flow cytometry raw data.
ID	Timepoint	Leukocytes_abs	Lymphozytes_abs	Lymphozytes_rel	CD3_perc_lympho	CD3_abs	CD4_perc_CD3	CD4_abs	RTE_perc_CD4 (Thymus migrant)	RTE_abs (Thymus migrant)	naïve_perc_CD4	naïve_abs	Effectormemory_perc_CD4	Effectormemory_abs	centralMemory_perc_CD4	centralMemory_abs	Effector_perc_CD4	Effector_abs	CD8_perc_lympho	CD8_abs	RTE_perc_CD8 (Thymus migrant)	RTE_abs (Thymus migrant)	naïve_perc_CD8	naïve_abs	Effectormemory_perc_CD8	Effectormemory_abs26	centralMemory_perc_CD8	centralMemory_abs	Effector_perc_CD8	Effector_abs
Patient 1	1	7.3	1.5	20.1	57.2	0.858	66.3	568.854	8.8	50.0592	25.9	147.333	41.8	237.781	16.5	93.8609	6.4	36.4067	26.7	229.086	5.7	13.0579	8.2	18.7851	37.7	86.3654	1.1	0.143637	45.7	104.692
Patient 2	1	6.5	0.5	7.9	61.1	0.3055	64.8	197.964	2.1	4.15724	11.1	21.974	45.5	90.0736	31.7	62.7546	1	1.97964	30.7	93.7885	6.8	6.37762	10.3	9.66022	49.6	46.5191	5.7	0.363524	19.4	18.195
Patient 3	1	6.6	1.2	18.1	48.3	0.5796	64.8	375.581	5.4	20.2814	19.1	71.7359	47.9	179.903	21.7	81.501	4.2	15.7744	24.4	141.422	2.4	3.39414	9.1	12.8694	34.6	48.9322	14.2	0.481968	24.9	35.2142
Patient 4	1	6.9	1.9	27.2	77.8	1.4782	83	1226.91	14	171.767	51.3	629.403	17.7	217.162	19.5	239.247	4	49.0762	14.7	217.295	32.1	69.7518	34.4	74.7496	30.5	66.2751	2.3	1.60429	26.7	58.0179
Patient 5	1	9.8	2.7	27.3	87.3	2.3571	36	848.556	4.8	40.7307	34.4	291.903	42.8	363.182	8.2	69.5816	6.2	52.6105	59.5	1402.47	1.8	25.2445	2	28.0495	16.4	230.006	0.1	0.0252445	70.7	991.549
Patient 6	1	7.7	1.1	14.7	72.8	0.8008	77.3	619.018	10.2	63.1399	28	173.325	41.7	258.131	16.3	100.9	4.4	27.2368	20.3	162.562	2.6	4.22662	3.8	6.17737	40.3	65.5126	2.1	0.0887591	41.8	67.9511
Patient 7	1	7.7	1.7	21.6	38.9	0.6613	70.6	466.878	17.1	79.8361	47.3	220.833	21.5	100.379	22.8	106.448	1.5	7.00317	26.4	174.583	12	20.95	15.5	27.0604	27.5	48.0104	4.5	0.942749	45.4	79.2608
Patient 8	1	4.4	1	22	75.8	0.758	47.6	360.808	13.6	49.0699	38.3	138.189	29.3	105.717	17.5	63.1414	3.5	12.6283	43.1	326.698	3	9.80094	3.4	11.1077	38.1	124.472	0.5	0.0490047	50.1	163.676
Patient 9	1	5.2	1.2	23.5	80.1	0.9612	62.5	600.75	15.8	94.9185	32.2	193.441	40.6	243.905	16.5	99.1238	1.7	10.2127	33.8	324.886	29.1	94.5417	32.7	106.238	32.2	104.613	4.3	4.06529	26	84.4703
Patient 10	1	3.1	0.8	25	79	0.632	66.3	419.016	16.7	69.9757	23.3	97.6307	38.7	162.159	30.7	128.638	0.5	2.09508	25.5	161.16	32.4	52.2158	34.7	55.9225	43.5	70.1046	2.7	1.40983	13.3	21.4343
Patient 11	1	10.2	5.9	60	NA	NA	NA	NA	NA	NA	NA	NA	NA	NA	NA	NA	NA	NA	30.7	NA	7.7	NA	8.7	NA	70.8	NA	1.6	NA	14.3	NA
Patient 12	1	8.7	0.4	5	66.5	0.266	82.3	218.918	4.1	8.97564	16.8	36.7782	46	100.702	18.9	41.3755	3.2	7.00538	14.5	38.57	20.1	7.75257	23.1	8.90967	50.3	19.4007	3.8	0.294598	14.2	5.47694
Patient 13	1	9.6	2.9	30.7	90.7	2.6303	17.9	470.824	0.1	0.470824	0.3	1.41247	80.5	379.013	3.2	15.0664	11.4	53.6739	72.9	1917.49	0	0	0.4	7.66995	11.6	222.429	0.7	0	81.3	1558.92
Patient 14	1	7.5	0.8	11.5	71.3	0.5704	60.3	343.951	8.2	28.204	15.8	54.3443	44.7	153.746	33.3	114.536	0.7	2.40766	35.3	201.351	10	20.1351	13	26.1757	33.9	68.2581	4.5	0.90608	39.4	79.3324
Patient 15	1	6.4	1	15.4	58.3	0.583	88.1	513.623	43.9	225.48	56.6	290.711	18.9	97.0747	9.4	48.2806	3.8	19.5177	7.8	45.474	22	10.0043	26	11.8232	23.7	10.7773	1.3	0.130056	40	18.1896
Patient 16	1	6.4	2	31	71.1	1.422	79.4	1129.07	28.9	326.301	30.2	340.979	43	485.499	11.2	126.456	2	22.5814	15.6	221.832	30.4	67.4369	34.2	75.8665	35	77.6412	2.7	1.8208	19.7	43.7009
Patient 17	1	7.4	1.5	20.8	77.7	1.1655	77.5	903.263	3.4	30.7109	14.1	127.36	57.9	522.989	20.6	186.072	1.1	9.93589	19.5	227.273	16.3	37.0454	18.9	42.9545	60.9	138.409	4.3	1.59295	6.3	14.3182
Patient 1	2	6.9	1.2	17.5	63.3	0.7596	69.5	527.922	7.3	38.5383	24.2	127.757	41.2	217.504	16.6	87.6351	3.5	18.4773	25	189.9	6.5	12.3435	9.9	18.8001	37.8	71.7822	1.4	0.172809	42.6	80.8974
Patient 2	2	6.6	0.6	9.8	64.8	0.3888	63.5	246.888	1	2.46888	11.2	27.6515	48.7	120.234	34.3	84.6826	1.7	4.1971	29.9	116.251	6.5	7.55633	9.4	10.9276	47.7	55.4518	5.2	0.392929	20.5	23.8315
Patient 3	2	5.9	1.2	20.2	54	0.648	62.1	402.408	4.6	18.5108	22.1	88.9322	41.4	166.597	24.5	98.59	3	12.0722	26.7	173.016	2.6	4.49842	11.7	20.2429	24	41.5238	13.2	0.593791	24.2	41.8699
Patient 4	2	6.5	2	30	22.1	0.442	82	362.44	11.5	41.6806	45.3	164.185	17	61.6148	14	50.7416	1.6	5.79904	15.3	67.626	29.4	19.882	32.3	21.8432	30.9	20.8964	2.5	0.497051	24.9	16.8389
Patient 5	2	8.6	2.3	26.5	88.3	2.0309	35.8	727.062	13.3	96.6993	34.9	253.745	42.8	311.183	6.1	44.3508	8.4	61.0732	58.8	1194.17	2	23.8834	2.2	26.2717	12	143.3	0.1	0.0238834	76	907.569
Patient 6	2	7.7	1.4	18.5	80.9	1.1326	80.1	907.213	10.5	95.2573	31.1	282.143	37.3	338.39	12	108.866	7.5	68.0409	17.9	202.735	2.6	5.27112	4.9	9.93403	37.4	75.823	2.9	0.152862	43.1	87.379
Patient 7	2	8.3	1.8	21.6	47.3	0.8514	73.6	626.63	11.4	71.4359	43.4	271.958	22.9	143.498	23.7	148.511	0.9	5.63967	24.5	208.593	13	27.1171	16.5	34.4178	29.9	62.3693	4.2	1.13892	40.3	84.063
Patient 8	2	3.9	0.9	22.9	76	0.684	51.4	351.576	12.6	44.2986	38.7	136.06	29.5	103.715	20.3	71.3699	3.7	13.0083	37.7	257.868	3.1	7.99391	3.6	9.28325	37.9	97.732	0.4	0.0319756	49	126.355
Patient 9	2	6	1.5	24.5	80.1	1.2015	64.3	772.564	17.9	138.289	30.8	237.95	39.2	302.845	20.9	161.466	3.1	23.9495	30.7	368.861	32.3	119.142	35.7	131.683	28.2	104.019	4.5	5.36139	24.3	89.6331
Patient 10	2	4.4	1.3	30.2	77	1.001	66.2	662.662	17.1	113.315	24.1	159.702	37.8	250.486	34.4	227.956	0.7	4.63863	26.7	267.267	34.7	92.7416	37.1	99.1561	37.7	100.76	3	2.78225	16.6	44.3663
Patient 12	2	8.4	0.6	6.6	72.8	0.4368	81.3	355.118	3.5	12.4291	9.9	35.1567	51.5	182.886	24.4	86.6489	1.5	5.32678	15.3	66.8304	14.3	9.55675	17.1	11.428	65.3	43.6403	4.8	0.458724	7.4	4.94545
Patient 13	2	6.5	0.7	10.5	89.3	0.6251	21.9	136.897	0.1	0.136897	0.8	1.09518	76.6	104.863	11.9	16.2907	4.9	6.70795	70.2	438.82	0.1	0.43882	1.1	4.82702	17.6	77.2324	2.9	0.0127258	70.6	309.807
Patient 14	2	7.8	0.8	10.6	76.6	0.6128	64.7	396.482	8.5	33.7009	13.5	53.525	51.4	203.792	28.3	112.204	1.3	5.15426	31.8	194.87	12.8	24.9434	14.8	28.8408	41.6	81.0661	3	0.748302	30.5	59.4355
Patient 15	2	6.2	1	16.3	62.8	0.628	89.2	560.176	45.2	253.2	57.1	319.86	20.8	116.517	8	44.8141	1.5	8.40264	7.5	47.1	28.7	13.5177	33.2	15.6372	19.7	9.2787	1.8	0.243319	34.7	16.3437
Patient 16	2	5.6	1.8	32.6	73.3	1.3194	70.4	928.858	26.7	248.005	32.8	304.665	42.9	398.48	13.4	124.467	1.6	14.8617	23.9	315.337	35.8	112.891	38.4	121.089	33.1	104.376	1.8	2.03203	17.4	54.8686
Patient 17	2	7.4	2	26.9	78.8	1.576	77.2	1216.67	3.7	45.0169	15	182.501	62.2	756.77	16.2	197.101	1.5	18.2501	20.1	316.776	18.7	59.2371	20.8	65.8894	59.7	189.115	4.6	2.72491	7.2	22.8079
Patient 1	3	6.1	1.7	27.8	63.9	1.0863	67.7	735.425	4.1	30.1524	25.8	189.74	40.9	300.789	19	139.731	4.2	30.8879	25	271.575	37.2	101.026	8.7	23.627	40.8	110.803	1.3	1.31334	37.2	101.026
Patient 2	3	7.5	0.5	6	62.5	0.3125	56	175	2	3.5	10	17.5	53.6	93.8	23.7	41.475	1.4	2.45	38.6	120.625	3.3	3.98062	5.7	6.87563	63.8	76.9587	3.7	0.147283	20.4	24.6075
Patient 3	3	6.6	0.6	9.2	52.1	0.3126	68	212.568	6.6	14.0295	20.7	44.0016	43.8	93.1048	25.4	53.9923	2	4.25136	21.6	67.5216	2.7	1.82308	13.8	9.31798	24.5	16.5428	15	0.273462	27.5	18.5684
Patient 4	3	5.9	1.5	24.7	74.5	1.1175	81.8	914.115	17.6	160.884	47.8	436.947	22.5	205.676	16.4	149.915	1.4	12.7976	15.1	168.743	25.3	42.6919	26.1	44.0418	40.9	69.0157	2.6	1.10999	19.1	32.2298
Patient 5	3	10.3	1.3	12.3	84.9	1.1037	41.8	461.347	12.1	55.8229	44.5	205.299	35.5	163.778	6.1	28.1421	7.4	34.1396	53.5	590.48	3.1	18.3049	3.3	19.4858	12.1	71.448	0.1	0.0183049	75.8	447.583
Patient 6	3	8.8	1	11.3	79.6	0.796	79.6	633.616	9.9	62.728	26.8	169.809	43.5	275.623	18.2	115.318	5	31.6808	18.2	144.872	2.3	3.33206	3.8	5.50514	46.1	66.786	2.8	0.0932976	37.5	54.327
Patient 7	3	6.2	2.4	38.9	54	1.296	72.8	943.488	9.6	90.5748	38.7	365.13	33.2	313.238	19.2	181.15	1.1	10.3784	24	311.04	8.6	26.7494	10.6	32.9702	48.5	150.854	3.2	0.855982	29.3	91.1347
Patient 8	3	5.5	1	17.9	77.9	0.779	46.9	365.351	12.1	44.2075	37.5	137.007	35.3	128.969	17.2	62.8404	3.5	12.7873	40.3	313.937	2.4	7.53449	2.6	8.16236	39.9	125.261	0.4	0.030138	49.4	155.085
Patient 9	3	8.5	1.2	13.7	77.9	0.9348	61.7	576.772	16.3	94.0138	25.2	145.346	39.4	227.248	30.4	175.339	1.4	8.0748	34.6	323.441	26	84.0946	26.2	84.7415	36.1	116.762	5.2	4.37292	23.3	75.3617
Patient 10	3	4.5	1.3	29.2	75.8	0.9854	67.3	663.174	14.5	96.1603	19.3	127.993	39.4	261.291	35.5	235.427	0.8	5.30539	23.8	234.525	30.3	71.0611	30.6	71.7647	43.8	102.722	4.5	3.19775	12.2	28.6121
Patient 11	3	9.7	2.2	23	77.5	1.705	40.4	688.82	4.4	30.3081	17	117.099	54.4	374.718	19.3	132.942	2.2	15.154	48.6	828.63	5.6	46.4033	8.7	72.0908	49	406.029	6.1	2.8306	28.7	237.817
Patient 12	3	7.5	0.5	7	73.4	0.367	80.9	296.903	1	2.96903	8.4	24.9399	54.2	160.921	19.3	57.3023	2.1	6.23496	14.9	54.683	12.8	6.99942	14.8	8.09308	64.1	35.0518	5.2	0.36397	9	4.92147
Patient 14	3	6.9	0.8	11.4	77.8	0.6224	65.1	405.182	5.1	20.6643	15.4	62.3981	48.1	194.893	30.5	123.581	1.2	4.86219	31.4	195.434	12.6	24.6246	15.2	29.7059	41.5	81.1049	3.3	0.812613	31.4	61.3662
Patient 15	3	6	1.2	20.8	62	0.744	88.2	656.208	30.8	202.112	59.6	391.1	20.3	133.21	9.6	62.996	4	26.2483	8	59.52	31.5	18.7488	34.1	20.2963	22.5	13.392	3	0.562464	32.9	19.5821
Patient 16	3	5.8	1.6	28.3	80	1.28	76.1	974.08	12.9	125.656	20	194.816	52.6	512.366	16.3	158.775	2.1	20.4557	18.8	240.64	31.9	76.7642	34.1	82.0582	39.4	94.8122	4.2	3.22409	14.9	35.8554
Patient 17	3	6.7	1.3	19.9	78.6	1.0218	78.9	806.2	4.8	38.6976	15.4	124.155	51.4	414.387	25.7	207.193	1.1	8.8682	17.9	182.902	20.7	37.8608	24.8	45.3597	48.7	89.0734	9.2	3.48319	8.8	16.0954
Patient 1	4	9.6	1.9	19.8	50.6	0.9614	60.2	578.763	3.9	22.5717	22.7	131.379	47.3	273.755	15.5	89.7082	5.5	31.832	31.2	299.957	4.2	12.5982	5.7	17.0975	34.6	103.785	1	0.125982	51.1	153.278
Patient 2	4	6	0.8	14.1	61.1	0.4888	51.8	253.198	1.7	4.30437	8.5	21.5219	57.9	146.602	28.1	71.1488	1.9	4.81077	43.3	211.65	3.5	7.40776	6.1	12.9107	57.1	120.852	4.3	0.318534	25.2	53.3359
Patient 3	4	8.6	0.7	8.5	51.2	0.3584	61.1	218.982	6.4	14.0149	18.8	41.1687	44	96.3523	26.7	58.4683	2.4	5.25558	27.7	99.2768	2	1.98554	10.6	10.5233	28	27.7975	16	0.317686	22.3	22.1387
Patient 4	4	7.1	1.3	18.5	74.8	0.9724	78.5	763.334	12.6	96.1801	46.3	353.424	25.7	196.177	18.1	138.163	1.7	12.9767	18	175.032	22.6	39.5572	24.5	42.8828	40.5	70.888	2.5	0.988931	28.2	49.359
Patient 6	4	7.9	1.1	13.6	78.8	0.8668	79	684.772	16.4	112.303	30.1	206.116	40.1	274.594	15.7	107.509	5.7	39.032	18.8	162.958	2.3	3.74804	3.6	5.8665	47.9	78.0571	2.8	0.104945	36.1	58.828
Patient 7	4	7.3	2.9	40.3	50.1	1.4529	66.2	961.82	16.5	158.7	43.1	414.544	29.4	282.775	17.9	172.166	2	19.2364	30.9	448.946	9.9	44.4457	11.7	52.5267	38.5	172.844	3.1	1.37782	41.4	185.864
Patient 8	4	5.6	0.9	16.7	73.2	0.6588	35.3	232.556	7.3	16.9766	31.3	72.7902	39.7	92.3249	20.6	47.9066	4.2	9.76737	49	322.812	1.4	4.51937	1.7	5.4878	42.5	137.195	0.3	0.0135581	48.8	157.532
Patient 9	4	9.3	1.5	16.4	75.5	1.1325	65	736.125	12	88.335	24.2	178.142	37.9	278.991	25.5	187.712	2.4	17.667	31.2	353.34	23.3	82.3282	26.2	92.5751	28.5	100.702	5.8	4.77504	34.3	121.196
Patient 10	4	5.5	1.3	22.9	76.1	0.9893	67.3	665.799	14	93.2118	20.5	136.489	44.7	297.612	27.9	185.758	0.8	5.32639	25.6	253.261	28.9	73.1924	33	83.5761	40.9	103.584	2.8	2.04939	16	40.5217
Patient 11	4	5.7	1.9	33.3	81.9	1.5561	37.7	586.65	4.9	28.7458	13	76.2645	57.2	335.564	20.9	122.61	1.8	10.5597	54	840.294	4.5	37.8132	8	67.2235	36.4	305.867	7.5	2.83599	40	336.118
Patient 12	4	4.5	0.5	11.4	58.9	0.2945	59.6	175.522	13.3	23.3444	26.5	46.5133	37.4	65.6452	22.3	39.1414	1.3	2.28179	31.1	91.5895	8	7.32716	8.6	7.8767	79.8	73.0884	1.5	0.109907	7.5	6.86921
Patient 15	4	6.9	1.4	20.9	57.5	0.805	87.4	703.57	23.2	163.228	56.7	398.924	25.3	178.003	9.6	67.5427	2.5	17.5892	8.4	67.62	27.5	18.5955	29.6	20.0155	25.4	17.1755	2.5	0.464888	34.1	23.0584
Patient 16	4	5.7	1.8	32.4	74.8	1.3464	67.9	914.206	23.4	213.924	36.4	332.771	31.1	284.318	19.4	177.356	1.4	12.7989	25.1	337.946	35.7	120.647	37.5	126.73	30.8	104.087	2	2.41294	16.5	55.7612
Patient 17	4	11.4	1.6	14.1	68.5	1.096	68.9	755.144	4.2	31.716	16.7	126.109	53.2	401.737	19.9	150.274	1.3	9.81687	25.8	282.768	14.1	39.8703	16.8	47.505	59.6	168.53	4.4	1.75429	12.6	35.6288
